# Supplementary material for: Luminescent platinum complexes containing phosphorus-linked silole ligands
Source: Royal Society of Chemistry journal article supplement (doi:10.1039/c0dt00259c), 2010-01-01
Supplement: c0dt00259c.pdf [file c0dt00259c.pdf]

## Luminescent Platinum Complexes Containing Phosphorus-linked Silole Ligands

Janet Braddock-Wilking,\* Li-Bin Gao, and Nigam P. Rath

\* To whom correspondence should be addressed. E-mail: [wilkingj@umsl.edu](mailto:wilkingj@umsl.edu).

Department of Chemistry and Biochemistry and Center for Nanoscience, University of Missouri-  
St. Louis, St. Louis, Missouri 63121

Table of contents for supporting information:

|               |                                                                                             |
|---------------|---------------------------------------------------------------------------------------------|
| Pages S2-S4   | Table S1. Crystal data and structure refinement for <b>13</b>                               |
| Pages S3-S5   | Table S2. Atomic coordinates and equivalent isotropic displacement parameters for <b>13</b> |
| Pages S6-S18  | Table S3. Bond lengths and angles for <b>13</b>                                             |
| Pages S19-S21 | Table S4. Anisotropic displacement parameters for <b>13</b>                                 |
| Pages S22-S23 | Table S5. Hydrogen coordinates and isotropic displacement parameters for <b>13</b>          |
| Pages S24-S29 | Table S6. Torsion angles for <b>13</b>                                                      |

Table S1. Crystal data and structure refinement for **13**.

|                                   |                                                                                                                  |                 |
|-----------------------------------|------------------------------------------------------------------------------------------------------------------|-----------------|
| Identification code               | w12908/lt/glb3                                                                                                   |                 |
| Empirical formula                 | C <sub>146</sub> H <sub>118</sub> Cl <sub>18</sub> O <sub>2</sub> P <sub>4</sub> Pt <sub>2</sub> Si <sub>2</sub> |                 |
| Formula weight                    | 3112.74                                                                                                          |                 |
| Temperature                       | 100(2) K                                                                                                         |                 |
| Wavelength                        | 0.71073 Å                                                                                                        |                 |
| Crystal system                    | Monoclinic                                                                                                       |                 |
| Space group                       | P2 <sub>1</sub> /c                                                                                               |                 |
| Unit cell dimensions              | a = 22.261(4) Å                                                                                                  | α = 90°.        |
|                                   | b = 14.057(3) Å                                                                                                  | β = 98.290(7)°. |
|                                   | c = 22.741(4) Å                                                                                                  | γ = 90°.        |
| Volume                            | 7042(2) Å <sup>3</sup>                                                                                           |                 |
| Z                                 | 2                                                                                                                |                 |
| Density (calculated)              | 1.468 Mg/m <sup>3</sup>                                                                                          |                 |
| Absorption coefficient            | 2.439 mm <sup>-1</sup>                                                                                           |                 |
| F(000)                            | 3120                                                                                                             |                 |
| Crystal size                      | 0.51 x 0.30 x 0.11 mm <sup>3</sup>                                                                               |                 |
| Theta range for data collection   | 2.59 to 27.60°.                                                                                                  |                 |
| Index ranges                      | -28 ≤ h ≤ 26, -18 ≤ k ≤ 18, -29 ≤ l ≤ 29                                                                         |                 |
| Reflections collected             | 157483                                                                                                           |                 |
| Independent reflections           | 16135 [R(int) = 0.1008]                                                                                          |                 |
| Completeness to theta = 25.00°    | 99.8 %                                                                                                           |                 |
| Absorption correction             | Numerical                                                                                                        |                 |
| Max. and min. transmission        | 0.7752 and 0.3704                                                                                                |                 |
| Refinement method                 | Full-matrix least-squares on F <sup>2</sup>                                                                      |                 |
| Data / restraints / parameters    | 16135 / 55 / 694                                                                                                 |                 |
| Goodness-of-fit on F <sup>2</sup> | 1.177                                                                                                            |                 |
| Final R indices [I > 2σ(I)]       | R1 = 0.0761, wR2 = 0.1796                                                                                        |                 |
| R indices (all data)              | R1 = 0.1409, wR2 = 0.2280                                                                                        |                 |
| Largest diff. peak and hole       | 3.332 and -3.139 e.Å <sup>-3</sup>                                                                               |                 |

Table S2. Atomic coordinates ( $\times 10^4$ ) and equivalent isotropic displacement parameters ( $\text{\AA}^2 \times 10^3$ ) for **13**.  $U(\text{eq})$  is defined as one third of the trace of the orthogonalized  $U^{ij}$  tensor.

|       | x        | y         | z        | U(eq) |
|-------|----------|-----------|----------|-------|
| Pt(1) | 8491(1)  | 8666(1)   | 9911(1)  | 31(1) |
| P(1)  | 7972(1)  | 9692(2)   | 9219(1)  | 28(1) |
| P(2)  | 8605(1)  | 9655(2)   | 10731(1) | 34(1) |
| Si(1) | 4632(1)  | 10024(2)  | 8855(1)  | 27(1) |
| C(1)  | 8975(4)  | 7665(6)   | 10400(5) | 36(2) |
| C(2)  | 9308(5)  | 7049(7)   | 10632(5) | 41(3) |
| C(3)  | 9740(5)  | 6349(8)   | 10909(5) | 45(3) |
| C(4)  | 9836(5)  | 6233(9)   | 11517(6) | 50(3) |
| C(5)  | 10251(6) | 5555(12)  | 11766(7) | 70(4) |
| C(6)  | 10592(6) | 5048(11)  | 11450(7) | 72(4) |
| C(7)  | 10533(6) | 5177(11)  | 10846(8) | 73(4) |
| C(8)  | 10112(5) | 5853(9)   | 10570(6) | 58(3) |
| C(9)  | 8301(4)  | 7678(6)   | 9273(4)  | 31(2) |
| C(10) | 8089(4)  | 7089(7)   | 8913(4)  | 35(2) |
| C(11) | 7809(7)  | 6440(13)  | 8492(7)  | 82(2) |
| C(12) | 7840(7)  | 5458(13)  | 8563(7)  | 82(2) |
| C(13) | 7564(7)  | 4859(13)  | 8107(7)  | 82(2) |
| C(14) | 7257(7)  | 5234(13)  | 7606(7)  | 82(2) |
| C(15) | 7208(7)  | 6125(13)  | 7546(7)  | 82(2) |
| C(16) | 7469(7)  | 6738(13)  | 7969(7)  | 82(2) |
| C(17) | 8186(4)  | 9502(7)   | 8482(4)  | 33(2) |
| C(18) | 8802(4)  | 9315(8)   | 8435(5)  | 40(3) |
| C(19) | 8978(5)  | 9225(10)  | 7883(6)  | 56(3) |
| C(20) | 8567(6)  | 9265(11)  | 7379(5)  | 61(4) |
| C(21) | 7956(5)  | 9432(9)   | 7418(5)  | 47(3) |
| C(22) | 7767(5)  | 9546(7)   | 7970(4)  | 35(2) |
| C(23) | 8073(5)  | 10980(7)  | 9305(4)  | 33(2) |
| C(24) | 7777(5)  | 11458(7)  | 9714(5)  | 38(2) |
| C(25) | 7909(6)  | 12417(8)  | 9844(6)  | 54(3) |
| C(26) | 8332(6)  | 12892(9)  | 9555(6)  | 60(4) |
| C(27) | 8616(6)  | 12421(10) | 9150(6)  | 60(4) |

|        |         |          |          |       |
|--------|---------|----------|----------|-------|
| C(28)  | 8493(5) | 11468(8) | 9022(5)  | 48(3) |
| C(29)  | 7150(4) | 9529(7)  | 9124(4)  | 26(2) |
| C(30)  | 6924(4) | 8666(7)  | 9322(4)  | 30(2) |
| C(31)  | 6303(4) | 8510(7)  | 9259(4)  | 32(2) |
| C(32)  | 5880(4) | 9177(7)  | 8992(4)  | 28(2) |
| C(33)  | 6115(4) | 10023(7) | 8799(4)  | 32(2) |
| C(34)  | 6737(4) | 10197(7) | 8864(4)  | 33(2) |
| C(35)  | 5213(4) | 9042(7)  | 8942(4)  | 26(2) |
| C(36)  | 4911(4) | 8215(7)  | 8989(5)  | 36(2) |
| C(37)  | 4247(4) | 8312(7)  | 9017(6)  | 43(3) |
| C(38)  | 4003(4) | 9186(7)  | 8980(4)  | 32(2) |
| C(39)  | 4509(5) | 10531(9) | 8095(5)  | 50(3) |
| C(40)  | 4806(4) | 10983(7) | 9415(5)  | 38(2) |
| C(41)  | 5191(6) | 7244(9)  | 9030(7)  | 66(2) |
| C(42)  | 5470(5) | 6894(9)  | 8540(7)  | 66(2) |
| C(43)  | 5770(6) | 6022(9)  | 8585(7)  | 66(2) |
| C(44)  | 5765(6) | 5488(9)  | 9112(7)  | 66(2) |
| C(45)  | 5497(5) | 5839(9)  | 9590(7)  | 66(2) |
| C(46)  | 5214(6) | 6709(9)  | 9546(7)  | 66(2) |
| C(47)  | 3915(4) | 7354(5)  | 8997(5)  | 41(2) |
| C(48)  | 3861(5) | 6733(7)  | 8517(4)  | 41(2) |
| C(49)  | 3576(5) | 5859(6)  | 8551(4)  | 41(2) |
| C(50)  | 3346(5) | 5606(5)  | 9066(5)  | 41(2) |
| C(51)  | 3400(5) | 6227(7)  | 9546(4)  | 41(2) |
| C(52)  | 3685(5) | 7101(6)  | 9512(4)  | 41(2) |
| C(47') | 3891(8) | 7593(13) | 9413(9)  | 44(4) |
| C(48') | 3770(9) | 6703(15) | 9156(8)  | 44(4) |
| C(49') | 3497(9) | 6004(11) | 9459(9)  | 44(4) |
| C(50') | 3345(8) | 6194(12) | 10019(9) | 44(4) |
| C(51') | 3466(8) | 7084(14) | 10276(8) | 44(4) |
| C(52') | 3739(8) | 7783(11) | 9973(9)  | 44(4) |
| C(53)  | 3360(4) | 9451(7)  | 8998(4)  | 29(2) |
| C(54)  | 2869(4) | 8861(7)  | 8799(4)  | 31(2) |
| C(55)  | 2270(4) | 9098(8)  | 8857(4)  | 35(2) |
| C(56)  | 2146(4) | 9959(8)  | 9118(4)  | 32(2) |
| C(57)  | 2624(4) | 10583(7) | 9290(4)  | 33(2) |

|        |          |           |          |         |
|--------|----------|-----------|----------|---------|
| C(58)  | 3218(4)  | 10330(7)  | 9228(4)  | 34(2)   |
| C(59)  | 9089(4)  | 10685(8)  | 10697(5) | 43(3)   |
| C(60)  | 9395(4)  | 10781(8)  | 10203(5) | 43(3)   |
| C(61)  | 9815(5)  | 11502(9)  | 10172(7) | 61(4)   |
| C(62)  | 9919(6)  | 12150(10) | 10632(9) | 79(5)   |
| C(63)  | 9618(6)  | 12092(12) | 11107(8) | 82(5)   |
| C(64)  | 9215(5)  | 11350(10) | 11154(7) | 66(4)   |
| C(65)  | 8952(7)  | 9126(11)  | 11425(6) | 71(2)   |
| C(66)  | 9583(7)  | 9064(11)  | 11541(6) | 71(2)   |
| C(67)  | 9870(7)  | 8659(11)  | 12048(6) | 71(2)   |
| C(68)  | 9536(7)  | 8287(11)  | 12444(6) | 71(2)   |
| C(69)  | 8895(7)  | 8324(11)  | 12347(6) | 71(2)   |
| C(70)  | 8609(7)  | 8735(11)  | 11829(6) | 71(2)   |
| C(1S)  | 7784(5)  | 16262(7)  | 10345(5) | 62(4)   |
| Cl(1)  | 7081(2)  | 16154(3)  | 9887(2)  | 91(2)   |
| Cl(2)  | 8143(2)  | 15160(3)  | 10496(2) | 84(1)   |
| Cl(3)  | 7679(2)  | 16811(3)  | 11013(2) | 86(1)   |
| C(2S)  | 8168(5)  | 1910(11)  | 7438(6)  | 54(5)   |
| Cl(4)  | 8669(3)  | 2855(5)   | 7635(3)  | 62(2)   |
| Cl(5)  | 8124(4)  | 1661(3)   | 6678(2)  | 69(2)   |
| Cl(6)  | 7442(2)  | 2147(3)   | 7633(2)  | 67(2)   |
| C(2S') | 8399(8)  | 1470(40)  | 6980(20) | 160(50) |
| Cl(4') | 8956(6)  | 1042(9)   | 6593(7)  | 85(5)   |
| Cl(5') | 7678(7)  | 1486(10)  | 6573(10) | 124(8)  |
| Cl(6') | 8597(8)  | 2509(15)  | 7360(8)  | 86(6)   |
| C(3S)  | 4522(7)  | 3986(18)  | 8364(7)  | 178(14) |
| Cl(7)  | 3923(4)  | 3312(7)   | 8670(4)  | 225(3)  |
| Cl(8)  | 4240(4)  | 3976(7)   | 7554(4)  | 225(3)  |
| Cl(9)  | 5169(4)  | 3177(7)   | 8439(4)  | 225(3)  |
| O(1)   | 5970(20) | 2880(20)  | 7619(10) | 134(9)  |
| O(2)   | 3436(13) | 7078(13)  | 11211(7) | 134(9)  |

---

Table S3. Bond lengths [Å] and angles [°] for **13**.

---

|              |           |
|--------------|-----------|
| Pt(1)-C(9)   | 2.009(9)  |
| Pt(1)-C(1)   | 2.007(9)  |
| Pt(1)-P(2)   | 2.311(3)  |
| Pt(1)-P(1)   | 2.318(3)  |
| P(1)-C(17)   | 1.826(10) |
| P(1)-C(29)   | 1.826(9)  |
| P(1)-C(23)   | 1.832(10) |
| P(2)-C(65)   | 1.813(13) |
| P(2)-C(59)   | 1.813(11) |
| P(2)-C(56)#1 | 1.836(10) |
| Si(1)-C(39)  | 1.854(11) |
| Si(1)-C(40)  | 1.856(11) |
| Si(1)-C(35)  | 1.881(10) |
| Si(1)-C(38)  | 1.883(10) |
| C(1)-C(2)    | 1.211(10) |
| C(2)-C(3)    | 1.453(14) |
| C(3)-C(4)    | 1.377(16) |
| C(3)-C(8)    | 1.397(17) |
| C(4)-C(5)    | 1.391(18) |
| C(4)-H(4A)   | 0.9500    |
| C(5)-C(6)    | 1.33(2)   |
| C(5)-H(5A)   | 0.9500    |
| C(6)-C(7)    | 1.37(2)   |
| C(6)-H(6A)   | 0.9500    |
| C(7)-C(8)    | 1.417(18) |
| C(7)-H(7A)   | 0.9500    |
| C(8)-H(8A)   | 0.9500    |
| C(9)-C(10)   | 1.211(10) |
| C(10)-C(11)  | 1.402(17) |
| C(11)-C(12)  | 1.39(2)   |
| C(11)-C(16)  | 1.38(2)   |
| C(12)-C(13)  | 1.406(19) |
| C(12)-H(12A) | 0.9500    |
| C(13)-C(14)  | 1.35(2)   |

|              |           |
|--------------|-----------|
| C(13)-H(13A) | 0.9500    |
| C(14)-C(15)  | 1.26(2)   |
| C(14)-H(14A) | 0.9500    |
| C(15)-C(16)  | 1.357(19) |
| C(15)-H(15A) | 0.9500    |
| C(16)-H(16A) | 0.9500    |
| C(17)-C(22)  | 1.384(14) |
| C(17)-C(18)  | 1.416(13) |
| C(18)-C(19)  | 1.373(15) |
| C(18)-H(18A) | 0.9500    |
| C(19)-C(20)  | 1.360(17) |
| C(19)-H(19A) | 0.9500    |
| C(20)-C(21)  | 1.395(16) |
| C(20)-H(20A) | 0.9500    |
| C(21)-C(22)  | 1.391(14) |
| C(21)-H(21A) | 0.9500    |
| C(22)-H(22A) | 0.9500    |
| C(23)-C(24)  | 1.388(15) |
| C(23)-C(28)  | 1.390(15) |
| C(24)-C(25)  | 1.402(15) |
| C(24)-H(24A) | 0.9500    |
| C(25)-C(26)  | 1.393(18) |
| C(25)-H(25A) | 0.9500    |
| C(26)-C(27)  | 1.362(19) |
| C(26)-H(26A) | 0.9500    |
| C(27)-C(28)  | 1.390(17) |
| C(27)-H(27A) | 0.9500    |
| C(28)-H(28A) | 0.9500    |
| C(29)-C(34)  | 1.386(13) |
| C(29)-C(30)  | 1.411(13) |
| C(30)-C(31)  | 1.387(12) |
| C(30)-H(30A) | 0.9500    |
| C(31)-C(32)  | 1.404(13) |
| C(31)-H(31A) | 0.9500    |
| C(32)-C(33)  | 1.395(13) |
| C(32)-C(35)  | 1.485(12) |

|              |           |
|--------------|-----------|
| C(33)-C(34)  | 1.392(12) |
| C(33)-H(33A) | 0.9500    |
| C(34)-H(34A) | 0.9500    |
| C(35)-C(36)  | 1.355(14) |
| C(36)-C(37)  | 1.495(13) |
| C(36)-C(41)  | 1.498(16) |
| C(37)-C(38)  | 1.341(14) |
| C(37)-C(47)  | 1.533(12) |
| C(37)-C(47') | 1.633(17) |
| C(38)-C(53)  | 1.487(13) |
| C(39)-H(39A) | 0.9800    |
| C(39)-H(39B) | 0.9800    |
| C(39)-H(39C) | 0.9800    |
| C(40)-H(40A) | 0.9800    |
| C(40)-H(40B) | 0.9800    |
| C(40)-H(40C) | 0.9800    |
| C(41)-C(46)  | 1.39(2)   |
| C(41)-C(42)  | 1.44(2)   |
| C(42)-C(43)  | 1.393(17) |
| C(42)-H(42A) | 0.9500    |
| C(43)-C(44)  | 1.42(2)   |
| C(43)-H(43A) | 0.9500    |
| C(44)-C(45)  | 1.40(2)   |
| C(44)-H(44A) | 0.9500    |
| C(45)-C(46)  | 1.371(17) |
| C(45)-H(45A) | 0.9500    |
| C(46)-H(46A) | 0.9500    |
| C(47)-C(48)  | 1.3900    |
| C(47)-C(52)  | 1.3900    |
| C(48)-C(49)  | 1.3900    |
| C(48)-H(48A) | 0.9500    |
| C(49)-C(50)  | 1.3900    |
| C(49)-H(49A) | 0.9500    |
| C(50)-C(51)  | 1.3900    |
| C(50)-H(50A) | 0.9500    |
| C(51)-C(52)  | 1.3900    |



|               |           |
|---------------|-----------|
| C(51)-H(51A)  | 0.9500    |
| C(52)-H(52A)  | 0.9500    |
| C(47')-C(48') | 1.3900    |
| C(47')-C(52') | 1.3900    |
| C(48')-C(49') | 1.3900    |
| C(48')-H(48') | 0.9500    |
| C(49')-C(50') | 1.3900    |
| C(49')-H(49') | 0.9500    |
| C(50')-C(51') | 1.3900    |
| C(50')-H(50') | 0.9500    |
| C(51')-C(52') | 1.3900    |
| C(51')-H(51') | 0.9500    |
| C(52')-H(52') | 0.9500    |
| C(53)-C(58)   | 1.396(14) |
| C(53)-C(54)   | 1.395(13) |
| C(54)-C(55)   | 1.399(13) |
| C(54)-H(54A)  | 0.9500    |
| C(55)-C(56)   | 1.392(14) |
| C(55)-H(55A)  | 0.9500    |
| C(56)-C(57)   | 1.391(13) |
| C(56)-P(2)#1  | 1.836(10) |
| C(57)-C(58)   | 1.395(13) |
| C(57)-H(57A)  | 0.9500    |
| C(58)-H(58A)  | 0.9500    |
| C(59)-C(64)   | 1.395(16) |
| C(59)-C(60)   | 1.401(16) |
| C(60)-C(61)   | 1.388(15) |
| C(60)-H(60A)  | 0.9500    |
| C(61)-C(62)   | 1.38(2)   |
| C(61)-H(61A)  | 0.9500    |
| C(62)-C(63)   | 1.35(2)   |
| C(62)-H(62A)  | 0.9500    |
| C(63)-C(64)   | 1.39(2)   |
| C(63)-H(63A)  | 0.9500    |
| C(64)-H(64A)  | 0.9500    |
| C(65)-C(70)   | 1.39(2)   |

|                  |           |
|------------------|-----------|
| C(65)-C(66)      | 1.39(2)   |
| C(66)-C(67)      | 1.360(17) |
| C(66)-H(66A)     | 0.9500    |
| C(67)-C(68)      | 1.35(2)   |
| C(67)-H(67A)     | 0.9500    |
| C(68)-C(69)      | 1.41(2)   |
| C(68)-H(68A)     | 0.9500    |
| C(69)-C(70)      | 1.382(17) |
| C(69)-H(69A)     | 0.9500    |
| C(70)-H(70A)     | 0.9500    |
| C(1S)-Cl(3)      | 1.748(10) |
| C(1S)-Cl(2)      | 1.754(10) |
| C(1S)-Cl(1)      | 1.758(9)  |
| C(1S)-H(1S)      | 1.0000    |
| C(2S)-Cl(5)      | 1.751(12) |
| C(2S)-Cl(4)      | 1.752(12) |
| C(2S)-Cl(6)      | 1.768(12) |
| C(2S)-H(2S)      | 1.0000    |
| C(2S')-Cl(6')    | 1.72(2)   |
| C(2S')-Cl(4')    | 1.72(2)   |
| C(2S')-Cl(5')    | 1.73(2)   |
| C(2S')-H(2S')    | 1.0000    |
| C(3S)-Cl(9)      | 1.823(15) |
| C(3S)-Cl(7)      | 1.852(17) |
| C(3S)-Cl(8)      | 1.860(17) |
| C(3S)-H(3S)      | 1.0000    |
|                  |           |
| C(9)-Pt(1)-C(1)  | 87.5(4)   |
| C(9)-Pt(1)-P(2)  | 170.4(3)  |
| C(1)-Pt(1)-P(2)  | 89.3(3)   |
| C(9)-Pt(1)-P(1)  | 84.7(3)   |
| C(1)-Pt(1)-P(1)  | 171.0(3)  |
| P(2)-Pt(1)-P(1)  | 99.17(9)  |
| C(17)-P(1)-C(29) | 105.3(4)  |
| C(17)-P(1)-C(23) | 101.4(5)  |
| C(29)-P(1)-C(23) | 104.1(5)  |

|                    |           |
|--------------------|-----------|
| C(17)-P(1)-Pt(1)   | 111.2(3)  |
| C(29)-P(1)-Pt(1)   | 113.3(3)  |
| C(23)-P(1)-Pt(1)   | 120.1(3)  |
| C(65)-P(2)-C(59)   | 100.5(7)  |
| C(65)-P(2)-C(56)#1 | 104.1(6)  |
| C(59)-P(2)-C(56)#1 | 109.6(5)  |
| C(65)-P(2)-Pt(1)   | 116.0(5)  |
| C(59)-P(2)-Pt(1)   | 116.3(4)  |
| C(56)#1-P(2)-Pt(1) | 109.4(3)  |
| C(39)-Si(1)-C(40)  | 110.4(6)  |
| C(39)-Si(1)-C(35)  | 112.8(5)  |
| C(40)-Si(1)-C(35)  | 112.8(4)  |
| C(39)-Si(1)-C(38)  | 111.6(5)  |
| C(40)-Si(1)-C(38)  | 115.9(5)  |
| C(35)-Si(1)-C(38)  | 92.3(4)   |
| C(2)-C(1)-Pt(1)    | 171.4(10) |
| C(1)-C(2)-C(3)     | 176.4(11) |
| C(4)-C(3)-C(8)     | 118.5(11) |
| C(4)-C(3)-C(2)     | 120.8(11) |
| C(8)-C(3)-C(2)     | 120.4(11) |
| C(3)-C(4)-C(5)     | 119.2(13) |
| C(3)-C(4)-H(4A)    | 120.4     |
| C(5)-C(4)-H(4A)    | 120.4     |
| C(6)-C(5)-C(4)     | 123.1(14) |
| C(6)-C(5)-H(5A)    | 118.4     |
| C(4)-C(5)-H(5A)    | 118.4     |
| C(5)-C(6)-C(7)     | 119.5(13) |
| C(5)-C(6)-H(6A)    | 120.3     |
| C(7)-C(6)-H(6A)    | 120.3     |
| C(6)-C(7)-C(8)     | 119.6(14) |
| C(6)-C(7)-H(7A)    | 120.2     |
| C(8)-C(7)-H(7A)    | 120.2     |
| C(3)-C(8)-C(7)     | 119.8(13) |
| C(3)-C(8)-H(8A)    | 120.1     |
| C(7)-C(8)-H(8A)    | 120.1     |
| C(10)-C(9)-Pt(1)   | 169.0(8)  |

|                    |           |
|--------------------|-----------|
| C(9)-C(10)-C(11)   | 176.3(12) |
| C(12)-C(11)-C(16)  | 114.4(14) |
| C(12)-C(11)-C(10)  | 123.8(15) |
| C(16)-C(11)-C(10)  | 121.8(16) |
| C(11)-C(12)-C(13)  | 120.0(17) |
| C(11)-C(12)-H(12A) | 120.0     |
| C(13)-C(12)-H(12A) | 120.0     |
| C(14)-C(13)-C(12)  | 120.2(18) |
| C(14)-C(13)-H(13A) | 119.9     |
| C(12)-C(13)-H(13A) | 119.9     |
| C(15)-C(14)-C(13)  | 120.2(16) |
| C(15)-C(14)-H(14A) | 119.9     |
| C(13)-C(14)-H(14A) | 119.9     |
| C(14)-C(15)-C(16)  | 122.1(19) |
| C(14)-C(15)-H(15A) | 118.9     |
| C(16)-C(15)-H(15A) | 118.9     |
| C(15)-C(16)-C(11)  | 122.9(18) |
| C(15)-C(16)-H(16A) | 118.5     |
| C(11)-C(16)-H(16A) | 118.5     |
| C(22)-C(17)-C(18)  | 119.1(9)  |
| C(22)-C(17)-P(1)   | 122.2(7)  |
| C(18)-C(17)-P(1)   | 118.8(8)  |
| C(19)-C(18)-C(17)  | 119.6(10) |
| C(19)-C(18)-H(18A) | 120.2     |
| C(17)-C(18)-H(18A) | 120.2     |
| C(20)-C(19)-C(18)  | 121.4(11) |
| C(20)-C(19)-H(19A) | 119.3     |
| C(18)-C(19)-H(19A) | 119.3     |
| C(19)-C(20)-C(21)  | 119.8(11) |
| C(19)-C(20)-H(20A) | 120.1     |
| C(21)-C(20)-H(20A) | 120.1     |
| C(22)-C(21)-C(20)  | 120.0(10) |
| C(22)-C(21)-H(21A) | 120.0     |
| C(20)-C(21)-H(21A) | 120.0     |
| C(17)-C(22)-C(21)  | 120.1(10) |
| C(17)-C(22)-H(22A) | 120.0     |

|                    |           |
|--------------------|-----------|
| C(21)-C(22)-H(22A) | 120.0     |
| C(24)-C(23)-C(28)  | 119.2(10) |
| C(24)-C(23)-P(1)   | 119.1(8)  |
| C(28)-C(23)-P(1)   | 121.2(9)  |
| C(23)-C(24)-C(25)  | 120.0(10) |
| C(23)-C(24)-H(24A) | 120.0     |
| C(25)-C(24)-H(24A) | 120.0     |
| C(26)-C(25)-C(24)  | 119.8(12) |
| C(26)-C(25)-H(25A) | 120.1     |
| C(24)-C(25)-H(25A) | 120.1     |
| C(25)-C(26)-C(27)  | 119.8(12) |
| C(25)-C(26)-H(26A) | 120.1     |
| C(27)-C(26)-H(26A) | 120.1     |
| C(26)-C(27)-C(28)  | 120.9(12) |
| C(26)-C(27)-H(27A) | 119.5     |
| C(28)-C(27)-H(27A) | 119.5     |
| C(27)-C(28)-C(23)  | 120.3(12) |
| C(27)-C(28)-H(28A) | 119.9     |
| C(23)-C(28)-H(28A) | 119.9     |
| C(34)-C(29)-C(30)  | 118.3(8)  |
| C(34)-C(29)-P(1)   | 123.8(7)  |
| C(30)-C(29)-P(1)   | 117.9(7)  |
| C(31)-C(30)-C(29)  | 119.9(9)  |
| C(31)-C(30)-H(30A) | 120.1     |
| C(29)-C(30)-H(30A) | 120.1     |
| C(30)-C(31)-C(32)  | 122.4(9)  |
| C(30)-C(31)-H(31A) | 118.8     |
| C(32)-C(31)-H(31A) | 118.8     |
| C(33)-C(32)-C(31)  | 116.5(8)  |
| C(33)-C(32)-C(35)  | 120.1(8)  |
| C(31)-C(32)-C(35)  | 123.2(9)  |
| C(34)-C(33)-C(32)  | 121.9(9)  |
| C(34)-C(33)-H(33A) | 119.0     |
| C(32)-C(33)-H(33A) | 119.0     |
| C(29)-C(34)-C(33)  | 120.9(9)  |
| C(29)-C(34)-H(34A) | 119.5     |

|                     |           |
|---------------------|-----------|
| C(33)-C(34)-H(34A)  | 119.5     |
| C(36)-C(35)-C(32)   | 127.3(9)  |
| C(36)-C(35)-Si(1)   | 107.2(6)  |
| C(32)-C(35)-Si(1)   | 125.4(7)  |
| C(35)-C(36)-C(37)   | 115.5(9)  |
| C(35)-C(36)-C(41)   | 125.5(9)  |
| C(37)-C(36)-C(41)   | 119.0(9)  |
| C(38)-C(37)-C(36)   | 118.3(9)  |
| C(38)-C(37)-C(47)   | 127.8(9)  |
| C(36)-C(37)-C(47)   | 113.3(9)  |
| C(38)-C(37)-C(47')  | 112.1(11) |
| C(36)-C(37)-C(47')  | 121.9(10) |
| C(47)-C(37)-C(47')  | 37.1(8)   |
| C(37)-C(38)-C(53)   | 127.7(9)  |
| C(37)-C(38)-Si(1)   | 106.2(7)  |
| C(53)-C(38)-Si(1)   | 126.0(7)  |
| Si(1)-C(39)-H(39A)  | 109.5     |
| Si(1)-C(39)-H(39B)  | 109.5     |
| H(39A)-C(39)-H(39B) | 109.5     |
| Si(1)-C(39)-H(39C)  | 109.5     |
| H(39A)-C(39)-H(39C) | 109.5     |
| H(39B)-C(39)-H(39C) | 109.5     |
| Si(1)-C(40)-H(40A)  | 109.5     |
| Si(1)-C(40)-H(40B)  | 109.5     |
| H(40A)-C(40)-H(40B) | 109.5     |
| Si(1)-C(40)-H(40C)  | 109.5     |
| H(40A)-C(40)-H(40C) | 109.5     |
| H(40B)-C(40)-H(40C) | 109.5     |
| C(46)-C(41)-C(42)   | 120.1(12) |
| C(46)-C(41)-C(36)   | 120.7(14) |
| C(42)-C(41)-C(36)   | 119.1(13) |
| C(43)-C(42)-C(41)   | 120.1(15) |
| C(43)-C(42)-H(42A)  | 119.9     |
| C(41)-C(42)-H(42A)  | 119.9     |
| C(42)-C(43)-C(44)   | 117.7(15) |
| C(42)-C(43)-H(43A)  | 121.1     |

|                      |           |
|----------------------|-----------|
| C(44)-C(43)-H(43A)   | 121.1     |
| C(45)-C(44)-C(43)    | 121.7(13) |
| C(45)-C(44)-H(44A)   | 119.1     |
| C(43)-C(44)-H(44A)   | 119.1     |
| C(46)-C(45)-C(44)    | 119.9(15) |
| C(46)-C(45)-H(45A)   | 120.0     |
| C(44)-C(45)-H(45A)   | 120.0     |
| C(45)-C(46)-C(41)    | 120.3(15) |
| C(45)-C(46)-H(46A)   | 119.9     |
| C(41)-C(46)-H(46A)   | 119.9     |
| C(48)-C(47)-C(52)    | 120.0     |
| C(48)-C(47)-C(37)    | 124.2(8)  |
| C(52)-C(47)-C(37)    | 115.8(8)  |
| C(49)-C(48)-C(47)    | 120.0     |
| C(49)-C(48)-H(48A)   | 120.0     |
| C(47)-C(48)-H(48A)   | 120.0     |
| C(48)-C(49)-C(50)    | 120.0     |
| C(48)-C(49)-H(49A)   | 120.0     |
| C(50)-C(49)-H(49A)   | 120.0     |
| C(51)-C(50)-C(49)    | 120.0     |
| C(51)-C(50)-H(50A)   | 120.0     |
| C(49)-C(50)-H(50A)   | 120.0     |
| C(50)-C(51)-C(52)    | 120.0     |
| C(50)-C(51)-H(51A)   | 120.0     |
| C(52)-C(51)-H(51A)   | 120.0     |
| C(51)-C(52)-C(47)    | 120.0     |
| C(51)-C(52)-H(52A)   | 120.0     |
| C(47)-C(52)-H(52A)   | 120.0     |
| C(48')-C(47')-C(52') | 120.0     |
| C(48')-C(47')-C(37)  | 113.9(13) |
| C(52')-C(47')-C(37)  | 126.0(13) |
| C(47')-C(48')-C(49') | 120.0     |
| C(47')-C(48')-H(48') | 120.0     |
| C(49')-C(48')-H(48') | 120.0     |
| C(48')-C(49')-C(50') | 120.0     |
| C(48')-C(49')-H(49') | 120.0     |

|                      |           |
|----------------------|-----------|
| C(50')-C(49')-H(49') | 120.0     |
| C(51')-C(50')-C(49') | 120.0     |
| C(51')-C(50')-H(50') | 120.0     |
| C(49')-C(50')-H(50') | 120.0     |
| C(52')-C(51')-C(50') | 120.0     |
| C(52')-C(51')-H(51') | 120.0     |
| C(50')-C(51')-H(51') | 120.0     |
| C(51')-C(52')-C(47') | 120.0     |
| C(51')-C(52')-H(52') | 120.0     |
| C(47')-C(52')-H(52') | 120.0     |
| C(58)-C(53)-C(54)    | 116.0(8)  |
| C(58)-C(53)-C(38)    | 120.3(8)  |
| C(54)-C(53)-C(38)    | 123.7(9)  |
| C(53)-C(54)-C(55)    | 122.7(9)  |
| C(53)-C(54)-H(54A)   | 118.6     |
| C(55)-C(54)-H(54A)   | 118.6     |
| C(56)-C(55)-C(54)    | 119.8(9)  |
| C(56)-C(55)-H(55A)   | 120.1     |
| C(54)-C(55)-H(55A)   | 120.1     |
| C(57)-C(56)-C(55)    | 118.5(9)  |
| C(57)-C(56)-P(2)#1   | 116.2(8)  |
| C(55)-C(56)-P(2)#1   | 125.3(7)  |
| C(56)-C(57)-C(58)    | 120.6(9)  |
| C(56)-C(57)-H(57A)   | 119.7     |
| C(58)-C(57)-H(57A)   | 119.7     |
| C(53)-C(58)-C(57)    | 122.2(9)  |
| C(53)-C(58)-H(58A)   | 118.9     |
| C(57)-C(58)-H(58A)   | 118.9     |
| C(64)-C(59)-C(60)    | 117.6(11) |
| C(64)-C(59)-P(2)     | 124.1(10) |
| C(60)-C(59)-P(2)     | 118.1(8)  |
| C(61)-C(60)-C(59)    | 121.3(12) |
| C(61)-C(60)-H(60A)   | 119.3     |
| C(59)-C(60)-H(60A)   | 119.3     |
| C(62)-C(61)-C(60)    | 118.9(14) |
| C(62)-C(61)-H(61A)   | 120.5     |



|                    |           |
|--------------------|-----------|
| C(60)-C(61)-H(61A) | 120.5     |
| C(63)-C(62)-C(61)  | 121.1(13) |
| C(63)-C(62)-H(62A) | 119.4     |
| C(61)-C(62)-H(62A) | 119.4     |
| C(62)-C(63)-C(64)  | 120.4(13) |
| C(62)-C(63)-H(63A) | 119.8     |
| C(64)-C(63)-H(63A) | 119.8     |
| C(59)-C(64)-C(63)  | 120.5(14) |
| C(59)-C(64)-H(64A) | 119.7     |
| C(63)-C(64)-H(64A) | 119.7     |
| C(70)-C(65)-C(66)  | 119.0(13) |
| C(70)-C(65)-P(2)   | 122.1(11) |
| C(66)-C(65)-P(2)   | 118.8(13) |
| C(67)-C(66)-C(65)  | 121.6(16) |
| C(67)-C(66)-H(66A) | 119.2     |
| C(65)-C(66)-H(66A) | 119.2     |
| C(68)-C(67)-C(66)  | 119.4(15) |
| C(68)-C(67)-H(67A) | 120.3     |
| C(66)-C(67)-H(67A) | 120.3     |
| C(67)-C(68)-C(69)  | 121.4(13) |
| C(67)-C(68)-H(68A) | 119.3     |
| C(69)-C(68)-H(68A) | 119.3     |
| C(70)-C(69)-C(68)  | 118.7(16) |
| C(70)-C(69)-H(69A) | 120.7     |
| C(68)-C(69)-H(69A) | 120.7     |
| C(65)-C(70)-C(69)  | 119.9(14) |
| C(65)-C(70)-H(70A) | 120.0     |
| C(69)-C(70)-H(70A) | 120.0     |
| Cl(3)-C(1S)-Cl(2)  | 109.5(6)  |
| Cl(3)-C(1S)-Cl(1)  | 109.5(6)  |
| Cl(2)-C(1S)-Cl(1)  | 112.4(6)  |
| Cl(3)-C(1S)-H(1S)  | 108.4     |
| Cl(2)-C(1S)-H(1S)  | 108.4     |
| Cl(1)-C(1S)-H(1S)  | 108.4     |
| Cl(5)-C(2S)-Cl(4)  | 110.3(8)  |
| Cl(5)-C(2S)-Cl(6)  | 111.3(8)  |

|                      |           |
|----------------------|-----------|
| Cl(4)-C(2S)-Cl(6)    | 111.3(8)  |
| Cl(5)-C(2S)-H(2S)    | 107.9     |
| Cl(4)-C(2S)-H(2S)    | 107.9     |
| Cl(6)-C(2S)-H(2S)    | 107.9     |
| Cl(6')-C(2S')-Cl(4') | 114(2)    |
| Cl(6')-C(2S')-Cl(5') | 114(2)    |
| Cl(4')-C(2S')-Cl(5') | 115(2)    |
| Cl(6')-C(2S')-H(2S') | 104.2     |
| Cl(4')-C(2S')-H(2S') | 104.2     |
| Cl(5')-C(2S')-H(2S') | 104.2     |
| Cl(9)-C(3S)-Cl(7)    | 104.3(11) |
| Cl(9)-C(3S)-Cl(8)    | 103.7(10) |
| Cl(7)-C(3S)-Cl(8)    | 102.1(11) |
| Cl(9)-C(3S)-H(3S)    | 115.0     |
| Cl(7)-C(3S)-H(3S)    | 115.0     |
| Cl(8)-C(3S)-H(3S)    | 115.0     |

---

Symmetry transformations used to generate equivalent atoms:

#1 -x+1,-y+2,-z+2

Table S4. Anisotropic displacement parameters ( $\text{\AA}^2 \times 10^3$ ) for **13**. The anisotropic displacement factor exponent takes the form:  $-2\pi^2 [ h^2 a^{*2} U^{11} + \dots + 2 h k a^* b^* U^{12} ]$

|       | U <sup>11</sup> | U <sup>22</sup> | U <sup>33</sup> | U <sup>23</sup> | U <sup>13</sup> | U <sup>12</sup> |
|-------|-----------------|-----------------|-----------------|-----------------|-----------------|-----------------|
| Pt(1) | 18(1)           | 39(1)           | 34(1)           | -1(1)           | -2(1)           | -6(1)           |
| P(1)  | 19(1)           | 35(1)           | 31(1)           | -3(1)           | 4(1)            | -8(1)           |
| P(2)  | 18(1)           | 46(2)           | 34(1)           | -4(1)           | -6(1)           | -1(1)           |
| Si(1) | 19(1)           | 32(1)           | 30(1)           | 3(1)            | -1(1)           | -6(1)           |
| C(1)  | 18(4)           | 23(5)           | 62(7)           | -5(5)           | -6(4)           | -12(4)          |
| C(2)  | 38(6)           | 29(5)           | 51(7)           | -5(5)           | -7(5)           | -7(4)           |
| C(3)  | 36(6)           | 35(5)           | 59(7)           | 2(6)            | -6(5)           | -3(5)           |
| C(4)  | 35(6)           | 60(8)           | 56(7)           | 5(6)            | 7(5)            | -4(5)           |
| C(5)  | 45(8)           | 93(11)          | 71(9)           | 32(9)           | 1(7)            | -2(8)           |
| C(6)  | 50(8)           | 74(10)          | 87(11)          | 17(9)           | -5(8)           | 18(7)           |
| C(7)  | 41(7)           | 72(10)          | 103(13)         | 0(9)            | 1(8)            | 10(7)           |
| C(8)  | 41(7)           | 57(8)           | 73(9)           | -2(7)           | -1(6)           | 6(6)            |
| C(9)  | 20(4)           | 23(5)           | 48(6)           | 1(4)            | 0(4)            | -2(4)           |
| C(10) | 27(5)           | 38(6)           | 43(6)           | -3(5)           | 11(4)           | -3(4)           |
| C(11) | 71(4)           | 97(5)           | 75(4)           | -37(4)          | 1(3)            | -15(4)          |
| C(12) | 71(4)           | 97(5)           | 75(4)           | -37(4)          | 1(3)            | -15(4)          |
| C(13) | 71(4)           | 97(5)           | 75(4)           | -37(4)          | 1(3)            | -15(4)          |
| C(14) | 71(4)           | 97(5)           | 75(4)           | -37(4)          | 1(3)            | -15(4)          |
| C(15) | 71(4)           | 97(5)           | 75(4)           | -37(4)          | 1(3)            | -15(4)          |
| C(16) | 71(4)           | 97(5)           | 75(4)           | -37(4)          | 1(3)            | -15(4)          |
| C(17) | 27(5)           | 37(5)           | 36(5)           | -4(4)           | 8(4)            | -6(4)           |
| C(18) | 24(5)           | 60(7)           | 36(6)           | 6(5)            | 4(4)            | -2(5)           |
| C(19) | 31(6)           | 83(10)          | 57(8)           | 0(7)            | 14(6)           | 3(6)            |
| C(20) | 54(8)           | 94(11)          | 37(6)           | -1(7)           | 17(6)           | 10(7)           |
| C(21) | 41(6)           | 68(8)           | 33(6)           | 1(5)            | 2(5)            | 4(6)            |
| C(22) | 30(5)           | 41(6)           | 34(5)           | 6(4)            | 6(4)            | 3(4)            |
| C(23) | 37(5)           | 28(5)           | 34(5)           | -2(4)           | 1(4)            | -6(4)           |
| C(24) | 37(5)           | 40(6)           | 37(5)           | 1(5)            | 3(4)            | -10(5)          |
| C(25) | 67(8)           | 33(6)           | 60(8)           | -6(6)           | 4(6)            | -1(6)           |
| C(26) | 73(9)           | 37(7)           | 68(9)           | 12(6)           | -1(7)           | -17(6)          |
| C(27) | 65(8)           | 64(9)           | 54(8)           | 3(7)            | 16(7)           | -31(7)          |

|        |       |       |        |       |        |        |
|--------|-------|-------|--------|-------|--------|--------|
| C(28)  | 46(6) | 49(7) | 46(6)  | 8(5)  | 3(5)   | -20(5) |
| C(29)  | 19(4) | 34(5) | 27(5)  | -2(4) | 4(4)   | -2(4)  |
| C(30)  | 27(5) | 34(5) | 26(4)  | 1(4)  | 0(4)   | -5(4)  |
| C(31)  | 24(4) | 45(6) | 27(5)  | 9(4)  | 6(4)   | -8(4)  |
| C(32)  | 23(4) | 37(5) | 24(4)  | -8(4) | 2(4)   | 1(4)   |
| C(33)  | 19(4) | 37(5) | 39(5)  | -1(4) | 4(4)   | -5(4)  |
| C(34)  | 24(5) | 30(5) | 43(6)  | -6(4) | 2(4)   | -3(4)  |
| C(35)  | 20(4) | 35(5) | 23(4)  | -3(4) | 2(3)   | -3(4)  |
| C(36)  | 21(5) | 37(5) | 46(6)  | -2(5) | -3(4)  | 0(4)   |
| C(37)  | 21(5) | 29(5) | 75(8)  | 7(5)  | -6(5)  | -8(4)  |
| C(38)  | 21(4) | 38(6) | 36(5)  | -4(4) | 0(4)   | -3(4)  |
| C(39)  | 31(6) | 65(8) | 50(7)  | 16(6) | -2(5)  | -7(5)  |
| C(40)  | 24(5) | 31(5) | 56(7)  | -1(5) | -4(5)  | 0(4)   |
| C(41)  | 39(3) | 42(3) | 106(5) | -4(3) | -19(3) | 1(2)   |
| C(42)  | 39(3) | 42(3) | 106(5) | -4(3) | -19(3) | 1(2)   |
| C(43)  | 39(3) | 42(3) | 106(5) | -4(3) | -19(3) | 1(2)   |
| C(44)  | 39(3) | 42(3) | 106(5) | -4(3) | -19(3) | 1(2)   |
| C(45)  | 39(3) | 42(3) | 106(5) | -4(3) | -19(3) | 1(2)   |
| C(46)  | 39(3) | 42(3) | 106(5) | -4(3) | -19(3) | 1(2)   |
| C(47)  | 25(3) | 34(4) | 63(5)  | 0(3)  | 6(3)   | -4(3)  |
| C(48)  | 25(3) | 34(4) | 63(5)  | 0(3)  | 6(3)   | -4(3)  |
| C(49)  | 25(3) | 34(4) | 63(5)  | 0(3)  | 6(3)   | -4(3)  |
| C(50)  | 25(3) | 34(4) | 63(5)  | 0(3)  | 6(3)   | -4(3)  |
| C(51)  | 25(3) | 34(4) | 63(5)  | 0(3)  | 6(3)   | -4(3)  |
| C(52)  | 25(3) | 34(4) | 63(5)  | 0(3)  | 6(3)   | -4(3)  |
| C(47') | 16(6) | 47(8) | 64(9)  | 15(7) | -6(5)  | -2(5)  |
| C(48') | 16(6) | 47(8) | 64(9)  | 15(7) | -6(5)  | -2(5)  |
| C(49') | 16(6) | 47(8) | 64(9)  | 15(7) | -6(5)  | -2(5)  |
| C(50') | 16(6) | 47(8) | 64(9)  | 15(7) | -6(5)  | -2(5)  |
| C(51') | 16(6) | 47(8) | 64(9)  | 15(7) | -6(5)  | -2(5)  |
| C(52') | 16(6) | 47(8) | 64(9)  | 15(7) | -6(5)  | -2(5)  |
| C(53)  | 25(5) | 35(5) | 27(5)  | 9(4)  | 3(4)   | -1(4)  |
| C(54)  | 17(4) | 38(6) | 36(5)  | -2(4) | -4(4)  | 1(4)   |
| C(55)  | 22(5) | 47(6) | 31(5)  | -1(5) | -6(4)  | -5(4)  |
| C(56)  | 20(4) | 49(6) | 26(5)  | 5(4)  | -4(4)  | 4(4)   |
| C(57)  | 26(5) | 37(5) | 34(5)  | -3(4) | 1(4)   | -3(4)  |

|        |         |         |          |         |         |         |
|--------|---------|---------|----------|---------|---------|---------|
| C(58)  | 20(5)   | 43(6)   | 37(5)    | -2(5)   | -1(4)   | -10(4)  |
| C(59)  | 18(5)   | 58(7)   | 52(7)    | -16(6)  | -1(4)   | -9(5)   |
| C(60)  | 19(5)   | 44(6)   | 64(7)    | 3(5)    | 0(5)    | -6(4)   |
| C(61)  | 23(5)   | 63(8)   | 96(10)   | -5(7)   | 3(6)    | -20(5)  |
| C(62)  | 31(7)   | 58(9)   | 144(16)  | -15(10) | -6(8)   | -17(6)  |
| C(63)  | 37(7)   | 95(12)  | 110(13)  | -57(10) | -10(8)  | -17(7)  |
| C(64)  | 25(5)   | 87(10)  | 83(10)   | -39(8)  | -6(6)   | -12(6)  |
| C(65)  | 70(4)   | 85(4)   | 48(3)    | -11(3)  | -24(3)  | 28(3)   |
| C(66)  | 70(4)   | 85(4)   | 48(3)    | -11(3)  | -24(3)  | 28(3)   |
| C(67)  | 70(4)   | 85(4)   | 48(3)    | -11(3)  | -24(3)  | 28(3)   |
| C(68)  | 70(4)   | 85(4)   | 48(3)    | -11(3)  | -24(3)  | 28(3)   |
| C(69)  | 70(4)   | 85(4)   | 48(3)    | -11(3)  | -24(3)  | 28(3)   |
| C(70)  | 70(4)   | 85(4)   | 48(3)    | -11(3)  | -24(3)  | 28(3)   |
| C(1S)  | 56(8)   | 71(9)   | 56(8)    | 17(7)   | -5(6)   | -32(7)  |
| Cl(1)  | 66(2)   | 112(3)  | 85(3)    | 48(2)   | -24(2)  | -51(2)  |
| Cl(2)  | 77(3)   | 61(2)   | 109(3)   | 14(2)   | -6(2)   | -26(2)  |
| Cl(3)  | 100(3)  | 89(3)   | 71(2)    | 18(2)   | 20(2)   | -29(2)  |
| C(2S)  | 44(10)  | 38(10)  | 72(13)   | 13(9)   | -14(9)  | 0(8)    |
| Cl(4)  | 59(3)   | 70(4)   | 54(4)    | 13(3)   | -8(3)   | -24(3)  |
| Cl(5)  | 103(6)  | 42(3)   | 54(3)    | 8(2)    | -10(3)  | 0(3)    |
| Cl(6)  | 52(3)   | 50(3)   | 92(4)    | 7(2)    | -16(2)  | -6(2)   |
| C(2S') | 50(30)  | 50(30)  | 350(140) | 40(60)  | -70(60) | 10(30)  |
| Cl(4') | 55(7)   | 69(8)   | 123(12)  | 22(8)   | -17(7)  | -29(6)  |
| Cl(5') | 57(8)   | 62(9)   | 220(20)  | 7(10)   | -73(11) | 7(7)    |
| Cl(6') | 66(9)   | 108(14) | 73(11)   | 41(10)  | -24(8)  | -28(9)  |
| C(3S)  | 260(30) | 130(20) | 180(20)  | 61(18)  | 170(20) | 80(20)  |
| Cl(7)  | 319(8)  | 207(5)  | 165(4)   | 45(4)   | 89(5)   | 97(5)   |
| Cl(8)  | 319(8)  | 207(5)  | 165(4)   | 45(4)   | 89(5)   | 97(5)   |
| Cl(9)  | 319(8)  | 207(5)  | 165(4)   | 45(4)   | 89(5)   | 97(5)   |
| O(1)   | 280(20) | 76(10)  | 33(7)    | 2(7)    | -3(10)  | 109(13) |
| O(2)   | 280(20) | 76(10)  | 33(7)    | 2(7)    | -3(10)  | 109(13) |

---

Table S5. Hydrogen coordinates ( $\times 10^4$ ) and isotropic displacement parameters ( $\text{\AA}^2 \times 10^{-3}$ ) for **13**.

|        | x     | y     | z     | U(eq) |
|--------|-------|-------|-------|-------|
| H(4A)  | 9621  | 6612  | 11763 | 60    |
| H(5A)  | 10293 | 5450  | 12183 | 85    |
| H(6A)  | 10874 | 4598  | 11640 | 86    |
| H(7A)  | 10773 | 4815  | 10615 | 87    |
| H(8A)  | 10082 | 5969  | 10155 | 69    |
| H(12A) | 8048  | 5192  | 8919  | 99    |
| H(13A) | 7595  | 4188  | 8152  | 99    |
| H(14A) | 7077  | 4826  | 7297  | 99    |
| H(15A) | 6981  | 6374  | 7194  | 99    |
| H(16A) | 7416  | 7401  | 7901  | 99    |
| H(18A) | 9092  | 9252  | 8782  | 48    |
| H(19A) | 9395  | 9133  | 7853  | 67    |
| H(20A) | 8696  | 9180  | 7002  | 73    |
| H(21A) | 7669  | 9467  | 7066  | 57    |
| H(22A) | 7351  | 9655  | 7996  | 42    |
| H(24A) | 7485  | 11135 | 9907  | 46    |
| H(25A) | 7711  | 12742 | 10128 | 65    |
| H(26A) | 8423  | 13543 | 9641  | 72    |
| H(27A) | 8902  | 12749 | 8952  | 73    |
| H(28A) | 8697  | 11148 | 8741  | 57    |
| H(30A) | 7197  | 8193  | 9499  | 35    |
| H(31A) | 6158  | 7930  | 9402  | 38    |
| H(33A) | 5843  | 10493 | 8617  | 38    |
| H(34A) | 6880  | 10782 | 8728  | 39    |
| H(39A) | 4847  | 10957 | 8044  | 74    |
| H(39B) | 4128  | 10889 | 8036  | 74    |
| H(39C) | 4489  | 10015 | 7803  | 74    |
| H(40A) | 5139  | 11375 | 9311  | 57    |
| H(40B) | 4926  | 10700 | 9808  | 57    |
| H(40C) | 4445  | 11380 | 9421  | 57    |

|        |       |       |       |     |
|--------|-------|-------|-------|-----|
| H(42A) | 5451  | 7259  | 8186  | 79  |
| H(43A) | 5972  | 5793  | 8272  | 79  |
| H(44A) | 5947  | 4875  | 9143  | 79  |
| H(45A) | 5511  | 5475  | 9944  | 79  |
| H(46A) | 5033  | 6946  | 9871  | 79  |
| H(48A) | 4018  | 6907  | 8165  | 49  |
| H(49A) | 3539  | 5434  | 8223  | 49  |
| H(50A) | 3152  | 5008  | 9089  | 49  |
| H(51A) | 3243  | 6053  | 9898  | 49  |
| H(52A) | 3722  | 7526  | 9840  | 49  |
| H(48') | 3874  | 6573  | 8774  | 52  |
| H(49') | 3414  | 5396  | 9284  | 52  |
| H(50') | 3158  | 5716  | 10226 | 52  |
| H(51') | 3361  | 7214  | 10659 | 52  |
| H(52') | 3821  | 8391  | 10148 | 52  |
| H(54A) | 2944  | 8275  | 8615  | 37  |
| H(55A) | 1948  | 8672  | 8720  | 41  |
| H(57A) | 2546  | 11186 | 9452  | 39  |
| H(58A) | 3535  | 10771 | 9346  | 41  |
| H(60A) | 9312  | 10344 | 9883  | 51  |
| H(61A) | 10027 | 11549 | 9840  | 73  |
| H(62A) | 10207 | 12645 | 10615 | 95  |
| H(63A) | 9683  | 12561 | 11410 | 99  |
| H(64A) | 9024  | 11295 | 11500 | 80  |
| H(66A) | 9818  | 9310  | 11258 | 85  |
| H(67A) | 10301 | 8638  | 12123 | 85  |
| H(68A) | 9737  | 7994  | 12794 | 85  |
| H(69A) | 8666  | 8072  | 12632 | 85  |
| H(70A) | 8178  | 8750  | 11749 | 85  |
| H(1S)  | 8055  | 16675 | 10139 | 75  |
| H(2S)  | 8334  | 1334  | 7663  | 64  |
| H(2S') | 8374  | 989   | 7293  | 190 |
| H(3S)  | 4610  | 4632  | 8541  | 214 |

---

Table S6. Torsion angles [°] for **13**.

---

|                         |            |
|-------------------------|------------|
| C(9)-Pt(1)-P(1)-C(17)   | -43.4(4)   |
| C(1)-Pt(1)-P(1)-C(17)   | -14.3(17)  |
| P(2)-Pt(1)-P(1)-C(17)   | 145.5(3)   |
| C(9)-Pt(1)-P(1)-C(29)   | 74.9(4)    |
| C(1)-Pt(1)-P(1)-C(29)   | 104.0(16)  |
| P(2)-Pt(1)-P(1)-C(29)   | -96.3(3)   |
| C(9)-Pt(1)-P(1)-C(23)   | -161.4(5)  |
| C(1)-Pt(1)-P(1)-C(23)   | -132.3(16) |
| P(2)-Pt(1)-P(1)-C(23)   | 27.4(4)    |
| C(9)-Pt(1)-P(2)-C(65)   | 62.8(17)   |
| C(1)-Pt(1)-P(2)-C(65)   | -7.4(7)    |
| P(1)-Pt(1)-P(2)-C(65)   | 175.7(6)   |
| C(9)-Pt(1)-P(2)-C(59)   | -179(23)   |
| C(1)-Pt(1)-P(2)-C(59)   | 110.5(5)   |
| P(1)-Pt(1)-P(2)-C(59)   | -66.4(4)   |
| C(9)-Pt(1)-P(2)-C(56)#1 | -54.6(16)  |
| C(1)-Pt(1)-P(2)-C(56)#1 | -124.8(4)  |
| P(1)-Pt(1)-P(2)-C(56)#1 | 58.3(4)    |
| C(9)-Pt(1)-C(1)-C(2)    | 56(5)      |
| P(2)-Pt(1)-C(1)-C(2)    | -133(5)    |
| P(1)-Pt(1)-C(1)-C(2)    | 27(6)      |
| Pt(1)-C(1)-C(2)-C(3)    | 64(22)     |
| C(1)-C(2)-C(3)-C(4)     | 97(20)     |
| C(1)-C(2)-C(3)-C(8)     | -76(20)    |
| C(8)-C(3)-C(4)-C(5)     | -6.8(17)   |
| C(2)-C(3)-C(4)-C(5)     | 179.8(11)  |
| C(3)-C(4)-C(5)-C(6)     | 4(2)       |
| C(4)-C(5)-C(6)-C(7)     | -1(2)      |
| C(5)-C(6)-C(7)-C(8)     | 0(2)       |
| C(4)-C(3)-C(8)-C(7)     | 6.3(18)    |
| C(2)-C(3)-C(8)-C(7)     | 179.7(11)  |
| C(6)-C(7)-C(8)-C(3)     | -3(2)      |
| C(1)-Pt(1)-C(9)-C(10)   | 109(5)     |
| P(2)-Pt(1)-C(9)-C(10)   | 39(6)      |



|                         |            |
|-------------------------|------------|
| P(1)-Pt(1)-C(9)-C(10)   | -75(5)     |
| Pt(1)-C(9)-C(10)-C(11)  | 36(23)     |
| C(9)-C(10)-C(11)-C(12)  | -134(20)   |
| C(9)-C(10)-C(11)-C(16)  | 45(21)     |
| C(16)-C(11)-C(12)-C(13) | 3(2)       |
| C(10)-C(11)-C(12)-C(13) | -177.6(14) |
| C(11)-C(12)-C(13)-C(14) | -2(3)      |
| C(12)-C(13)-C(14)-C(15) | -1(3)      |
| C(13)-C(14)-C(15)-C(16) | 2(3)       |
| C(14)-C(15)-C(16)-C(11) | 0(3)       |
| C(12)-C(11)-C(16)-C(15) | -3(3)      |
| C(10)-C(11)-C(16)-C(15) | 178.1(15)  |
| C(29)-P(1)-C(17)-C(22)  | 18.4(10)   |
| C(23)-P(1)-C(17)-C(22)  | -89.8(9)   |
| Pt(1)-P(1)-C(17)-C(22)  | 141.4(8)   |
| C(29)-P(1)-C(17)-C(18)  | -162.4(8)  |
| C(23)-P(1)-C(17)-C(18)  | 89.4(9)    |
| Pt(1)-P(1)-C(17)-C(18)  | -39.4(9)   |
| C(22)-C(17)-C(18)-C(19) | 3.0(17)    |
| P(1)-C(17)-C(18)-C(19)  | -176.2(10) |
| C(17)-C(18)-C(19)-C(20) | -3(2)      |
| C(18)-C(19)-C(20)-C(21) | 2(2)       |
| C(19)-C(20)-C(21)-C(22) | -1(2)      |
| C(18)-C(17)-C(22)-C(21) | -1.6(16)   |
| P(1)-C(17)-C(22)-C(21)  | 177.6(9)   |
| C(20)-C(21)-C(22)-C(17) | 0.4(18)    |
| C(17)-P(1)-C(23)-C(24)  | 159.3(8)   |
| C(29)-P(1)-C(23)-C(24)  | 50.2(9)    |
| Pt(1)-P(1)-C(23)-C(24)  | -77.8(9)   |
| C(17)-P(1)-C(23)-C(28)  | -28.4(10)  |
| C(29)-P(1)-C(23)-C(28)  | -137.5(9)  |
| Pt(1)-P(1)-C(23)-C(28)  | 94.5(9)    |
| C(28)-C(23)-C(24)-C(25) | -0.8(16)   |
| P(1)-C(23)-C(24)-C(25)  | 171.6(9)   |
| C(23)-C(24)-C(25)-C(26) | 0.8(17)    |
| C(24)-C(25)-C(26)-C(27) | 0(2)       |

|                         |            |
|-------------------------|------------|
| C(25)-C(26)-C(27)-C(28) | -1(2)      |
| C(26)-C(27)-C(28)-C(23) | 1(2)       |
| C(24)-C(23)-C(28)-C(27) | 0.2(17)    |
| P(1)-C(23)-C(28)-C(27)  | -172.1(10) |
| C(17)-P(1)-C(29)-C(34)  | -76.0(9)   |
| C(23)-P(1)-C(29)-C(34)  | 30.3(9)    |
| Pt(1)-P(1)-C(29)-C(34)  | 162.4(7)   |
| C(17)-P(1)-C(29)-C(30)  | 103.3(8)   |
| C(23)-P(1)-C(29)-C(30)  | -150.5(7)  |
| Pt(1)-P(1)-C(29)-C(30)  | -18.4(8)   |
| C(34)-C(29)-C(30)-C(31) | -0.6(14)   |
| P(1)-C(29)-C(30)-C(31)  | -179.9(7)  |
| C(29)-C(30)-C(31)-C(32) | 1.2(14)    |
| C(30)-C(31)-C(32)-C(33) | -1.0(14)   |
| C(30)-C(31)-C(32)-C(35) | -177.3(9)  |
| C(31)-C(32)-C(33)-C(34) | 0.3(14)    |
| C(35)-C(32)-C(33)-C(34) | 176.7(9)   |
| C(30)-C(29)-C(34)-C(33) | -0.1(14)   |
| P(1)-C(29)-C(34)-C(33)  | 179.2(7)   |
| C(32)-C(33)-C(34)-C(29) | 0.2(15)    |
| C(33)-C(32)-C(35)-C(36) | 165.0(10)  |
| C(31)-C(32)-C(35)-C(36) | -18.9(15)  |
| C(33)-C(32)-C(35)-Si(1) | -19.5(12)  |
| C(31)-C(32)-C(35)-Si(1) | 156.6(8)   |
| C(39)-Si(1)-C(35)-C(36) | -108.5(8)  |
| C(40)-Si(1)-C(35)-C(36) | 125.6(7)   |
| C(38)-Si(1)-C(35)-C(36) | 6.1(7)     |
| C(39)-Si(1)-C(35)-C(32) | 75.3(9)    |
| C(40)-Si(1)-C(35)-C(32) | -50.7(9)   |
| C(38)-Si(1)-C(35)-C(32) | -170.1(8)  |
| C(32)-C(35)-C(36)-C(37) | 170.6(9)   |
| Si(1)-C(35)-C(36)-C(37) | -5.5(11)   |
| C(32)-C(35)-C(36)-C(41) | -7.6(17)   |
| Si(1)-C(35)-C(36)-C(41) | 176.3(10)  |
| C(35)-C(36)-C(37)-C(38) | 1.6(15)    |
| C(41)-C(36)-C(37)-C(38) | 179.9(11)  |

|                          |            |
|--------------------------|------------|
| C(35)-C(36)-C(37)-C(47)  | 173.4(9)   |
| C(41)-C(36)-C(37)-C(47)  | -8.3(15)   |
| C(35)-C(36)-C(37)-C(47') | -145.6(12) |
| C(41)-C(36)-C(37)-C(47') | 32.7(18)   |
| C(36)-C(37)-C(38)-C(53)  | -180.0(9)  |
| C(47)-C(37)-C(38)-C(53)  | 9.6(19)    |
| C(47')-C(37)-C(38)-C(53) | -29.7(16)  |
| C(36)-C(37)-C(38)-Si(1)  | 3.2(13)    |
| C(47)-C(37)-C(38)-Si(1)  | -167.2(10) |
| C(47')-C(37)-C(38)-Si(1) | 153.5(10)  |
| C(39)-Si(1)-C(38)-C(37)  | 110.4(9)   |
| C(40)-Si(1)-C(38)-C(37)  | -122.0(8)  |
| C(35)-Si(1)-C(38)-C(37)  | -5.2(8)    |
| C(39)-Si(1)-C(38)-C(53)  | -66.4(10)  |
| C(40)-Si(1)-C(38)-C(53)  | 61.1(9)    |
| C(35)-Si(1)-C(38)-C(53)  | 177.9(8)   |
| C(35)-C(36)-C(41)-C(46)  | 113.2(14)  |
| C(37)-C(36)-C(41)-C(46)  | -64.9(15)  |
| C(35)-C(36)-C(41)-C(42)  | -62.9(16)  |
| C(37)-C(36)-C(41)-C(42)  | 118.9(12)  |
| C(46)-C(41)-C(42)-C(43)  | -0.6(18)   |
| C(36)-C(41)-C(42)-C(43)  | 175.5(10)  |
| C(41)-C(42)-C(43)-C(44)  | 2.6(17)    |
| C(42)-C(43)-C(44)-C(45)  | -3.4(18)   |
| C(43)-C(44)-C(45)-C(46)  | 2.1(18)    |
| C(44)-C(45)-C(46)-C(41)  | 0.1(18)    |
| C(42)-C(41)-C(46)-C(45)  | -0.8(18)   |
| C(36)-C(41)-C(46)-C(45)  | -176.9(10) |
| C(38)-C(37)-C(47)-C(48)  | 107.3(13)  |
| C(36)-C(37)-C(47)-C(48)  | -63.6(12)  |
| C(47')-C(37)-C(47)-C(48) | -176.3(17) |
| C(38)-C(37)-C(47)-C(52)  | -75.8(14)  |
| C(36)-C(37)-C(47)-C(52)  | 113.4(10)  |
| C(47')-C(37)-C(47)-C(52) | 0.6(13)    |
| C(52)-C(47)-C(48)-C(49)  | 0.0        |
| C(37)-C(47)-C(48)-C(49)  | 176.8(10)  |

|                             |            |
|-----------------------------|------------|
| C(47)-C(48)-C(49)-C(50)     | 0.0        |
| C(48)-C(49)-C(50)-C(51)     | 0.0        |
| C(49)-C(50)-C(51)-C(52)     | 0.0        |
| C(50)-C(51)-C(52)-C(47)     | 0.0        |
| C(48)-C(47)-C(52)-C(51)     | 0.0        |
| C(37)-C(47)-C(52)-C(51)     | -177.1(9)  |
| C(38)-C(37)-C(47)-C(48')    | 134.5(11)  |
| C(36)-C(37)-C(47)-C(48')    | -76.5(14)  |
| C(47)-C(37)-C(47)-C(48')    | 10.5(11)   |
| C(38)-C(37)-C(47)-C(52')    | -49.0(16)  |
| C(36)-C(37)-C(47)-C(52')    | 100.0(15)  |
| C(47)-C(37)-C(47)-C(52')    | -173(2)    |
| C(52')-C(47)-C(48')-C(49')  | 0.0        |
| C(37)-C(47)-C(48')-C(49')   | 176.7(14)  |
| C(47)-C(48')-C(49')-C(50')  | 0.0        |
| C(48')-C(49')-C(50')-C(51') | 0.0        |
| C(49')-C(50')-C(51')-C(52') | 0.0        |
| C(50')-C(51')-C(52')-C(47') | 0.0        |
| C(48')-C(47)-C(52')-C(51')  | 0.0        |
| C(37)-C(47)-C(52')-C(51')   | -176.3(16) |
| C(37)-C(38)-C(53)-C(58)     | 149.9(11)  |
| Si(1)-C(38)-C(53)-C(58)     | -33.9(13)  |
| C(37)-C(38)-C(53)-C(54)     | -29.6(16)  |
| Si(1)-C(38)-C(53)-C(54)     | 146.6(8)   |
| C(58)-C(53)-C(54)-C(55)     | -4.1(14)   |
| C(38)-C(53)-C(54)-C(55)     | 175.4(9)   |
| C(53)-C(54)-C(55)-C(56)     | 0.8(15)    |
| C(54)-C(55)-C(56)-C(57)     | 2.8(14)    |
| C(54)-C(55)-C(56)-P(2)#1    | -176.2(7)  |
| C(55)-C(56)-C(57)-C(58)     | -2.9(14)   |
| P(2)#1-C(56)-C(57)-C(58)    | 176.1(8)   |
| C(54)-C(53)-C(58)-C(57)     | 4.0(14)    |
| C(38)-C(53)-C(58)-C(57)     | -175.6(9)  |
| C(56)-C(57)-C(58)-C(53)     | -0.6(15)   |
| C(65)-P(2)-C(59)-C(64)      | -53.1(12)  |
| C(56)#1-P(2)-C(59)-C(64)    | 56.2(11)   |

|                          |            |
|--------------------------|------------|
| Pt(1)-P(2)-C(59)-C(64)   | -179.2(9)  |
| C(65)-P(2)-C(59)-C(60)   | 121.7(10)  |
| C(56)#1-P(2)-C(59)-C(60) | -129.0(9)  |
| Pt(1)-P(2)-C(59)-C(60)   | -4.4(10)   |
| C(64)-C(59)-C(60)-C(61)  | 1.1(17)    |
| P(2)-C(59)-C(60)-C(61)   | -174.1(9)  |
| C(59)-C(60)-C(61)-C(62)  | -1.8(19)   |
| C(60)-C(61)-C(62)-C(63)  | 0(2)       |
| C(61)-C(62)-C(63)-C(64)  | 3(2)       |
| C(60)-C(59)-C(64)-C(63)  | 1.6(19)    |
| P(2)-C(59)-C(64)-C(63)   | 176.4(11)  |
| C(62)-C(63)-C(64)-C(59)  | -4(2)      |
| C(59)-P(2)-C(65)-C(70)   | 139.5(13)  |
| C(56)#1-P(2)-C(65)-C(70) | 26.1(14)   |
| Pt(1)-P(2)-C(65)-C(70)   | -94.2(13)  |
| C(59)-P(2)-C(65)-C(66)   | -44.0(13)  |
| C(56)#1-P(2)-C(65)-C(66) | -157.5(12) |
| Pt(1)-P(2)-C(65)-C(66)   | 82.2(13)   |
| C(70)-C(65)-C(66)-C(67)  | -2(2)      |
| P(2)-C(65)-C(66)-C(67)   | -178.8(11) |
| C(65)-C(66)-C(67)-C(68)  | 2(2)       |
| C(66)-C(67)-C(68)-C(69)  | -1(2)      |
| C(67)-C(68)-C(69)-C(70)  | 1(2)       |
| C(66)-C(65)-C(70)-C(69)  | 2(2)       |
| P(2)-C(65)-C(70)-C(69)   | 178.8(11)  |
| C(68)-C(69)-C(70)-C(65)  | -2(2)      |

---

Symmetry transformations used to generate equivalent atoms:

#1 -x+1,-y+2,-z+2
